# Supplementary material for: Microclimate of Grape Bunch and Sunburn of White Grape Berries: Effect on Wine Quality
Source: MDPI journal article supplement (doi:10.3390/foods12030621), 2023-02-01
Supplement: s1 [file s1]

# Microclimate of Grape Bunch and Sunburn of White Grape Berries: Effect on Wine Quality

Laura Rustioni <sup>1,\*</sup>, Alessio Altomare <sup>2</sup>, Gvantsa Shanshiashvili <sup>2</sup>, Fabio Greco <sup>1</sup>, Riccardo Buccolieri <sup>1</sup>, Ileana Blanco <sup>1</sup>, Gabriele Cola <sup>3</sup> and Daniela Fracassetti <sup>2,\*</sup>

<sup>1</sup> Department of Biological and Environmental Sciences and Technologies, University of Salento, Via Provinciale Monteroni, 73100 Lecce, Italy

<sup>2</sup> Department of Food, Environmental and Nutritional Sciences (DeFENS), Università degli Studi di Milano, Via G. Celoria 2, 20133 Milan, Italy

<sup>3</sup> Department of Agricultural and Environmental Sciences (DISAA), Università degli Studi di Milano, Via G. Celoria 2, 20133 Milan, Italy

\* Correspondence: [laura.rustioni@unisalento.it](mailto:laura.rustioni@unisalento.it) (L.R.); [daniela.fracassetti@unimi.it](mailto:daniela.fracassetti@unimi.it) (D.F.)

**Table of contents**

|                                                                                                                                                                                                                             | <b>Page</b> |
|-----------------------------------------------------------------------------------------------------------------------------------------------------------------------------------------------------------------------------|-------------|
| <b>Figure S1:</b> Canopy appearance the 13 July 2021. On the left: not defoliated row; on the right: total leaf removal in the bunch zone to induce sunburn symptoms.                                                       | 3           |
| <b>Figure S2:</b> Example of berry classification based on the sunburn symptoms: (a) no symptomatic berries, (b) amber colored berries, (c) severely damaged berries, (d) completely dry berries.                           | 4           |
| <b>Figure S3:</b> Impact of the canopy management on the berry quality. On the left, an example of a bunch obtained in the leaf removed row; on the right, an example of a bunch collected in the not defoliated condition. | 5           |

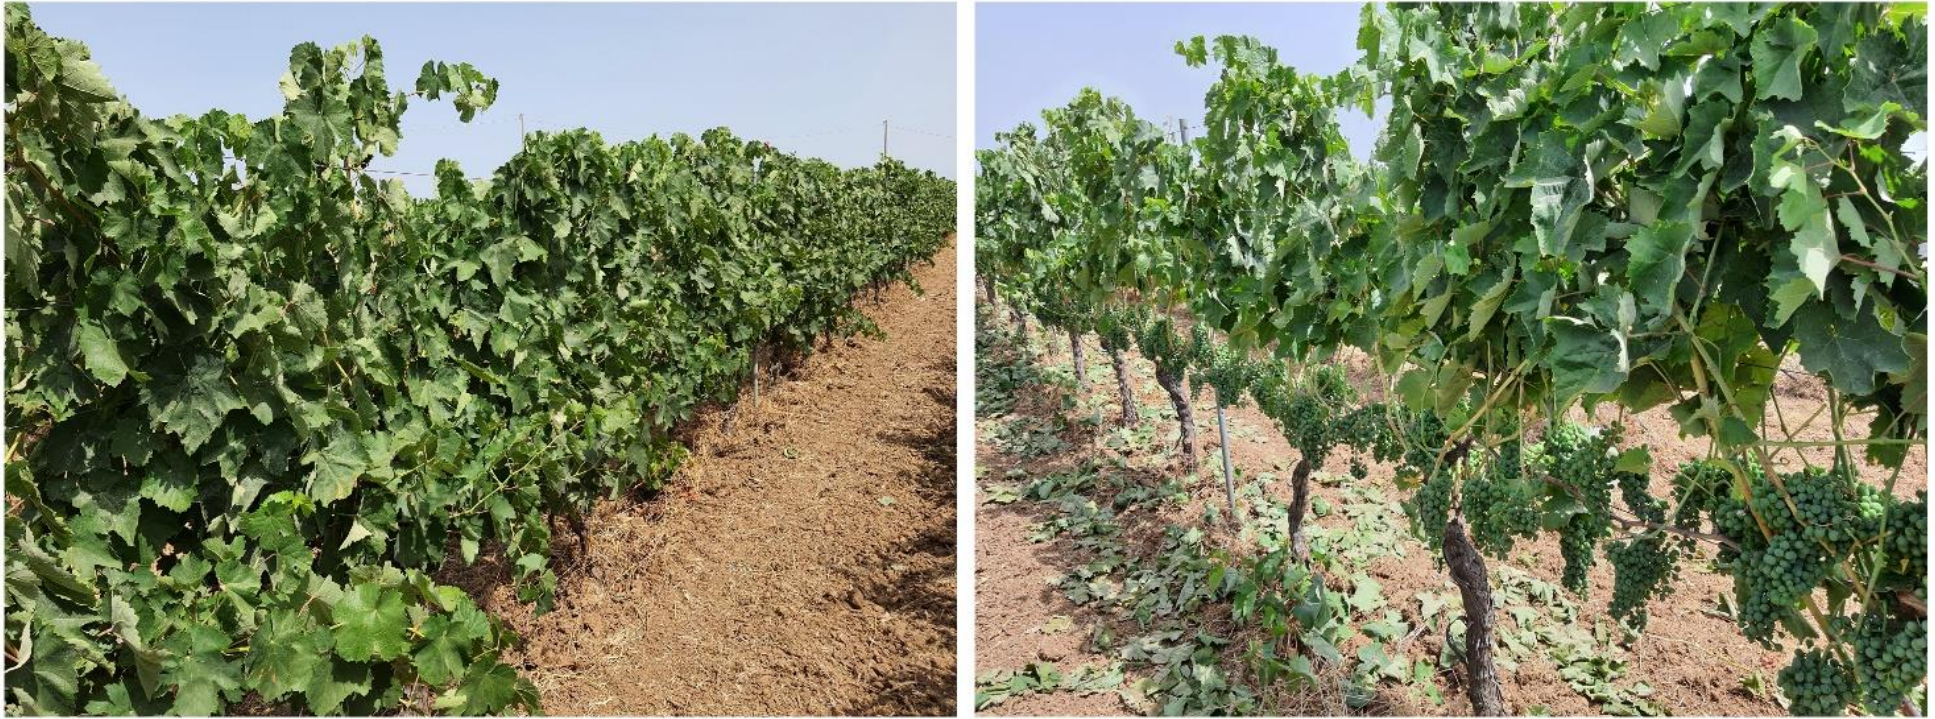

**Figure S1.** Canopy appearance the 13 July 2021. On the left: not defoliated row; on the right: total leaf removal in the bunch zone to induce sunburn symptoms.

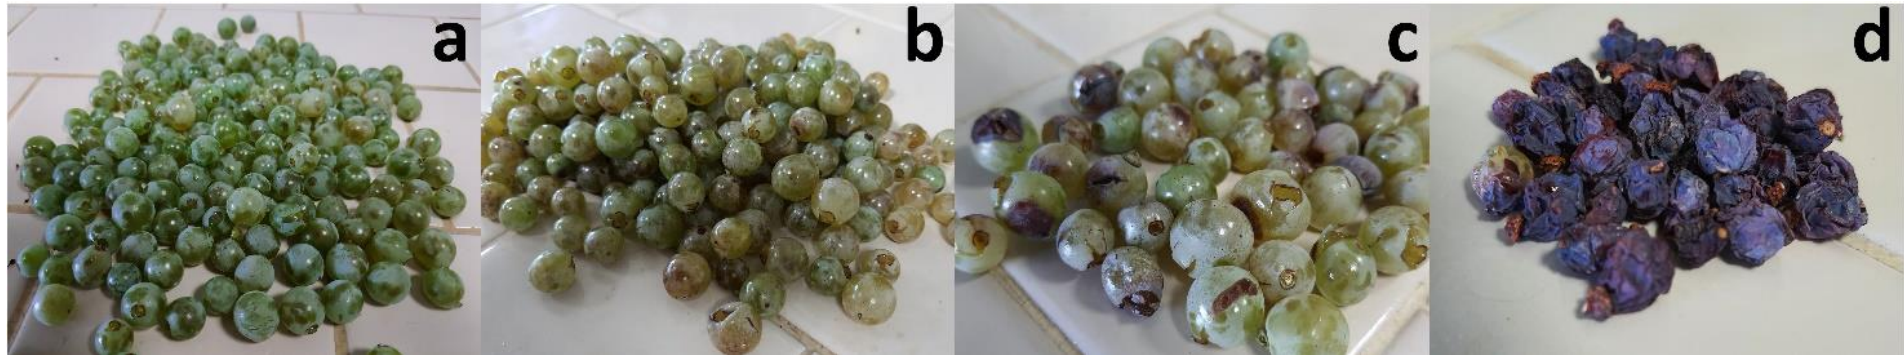

**Figure S2.** Example of berry classification based on the sunburn symptoms. (a) asymptomatic berries, (b) amber colored berries, (c) severely damaged berries, (d) completely dry berries.



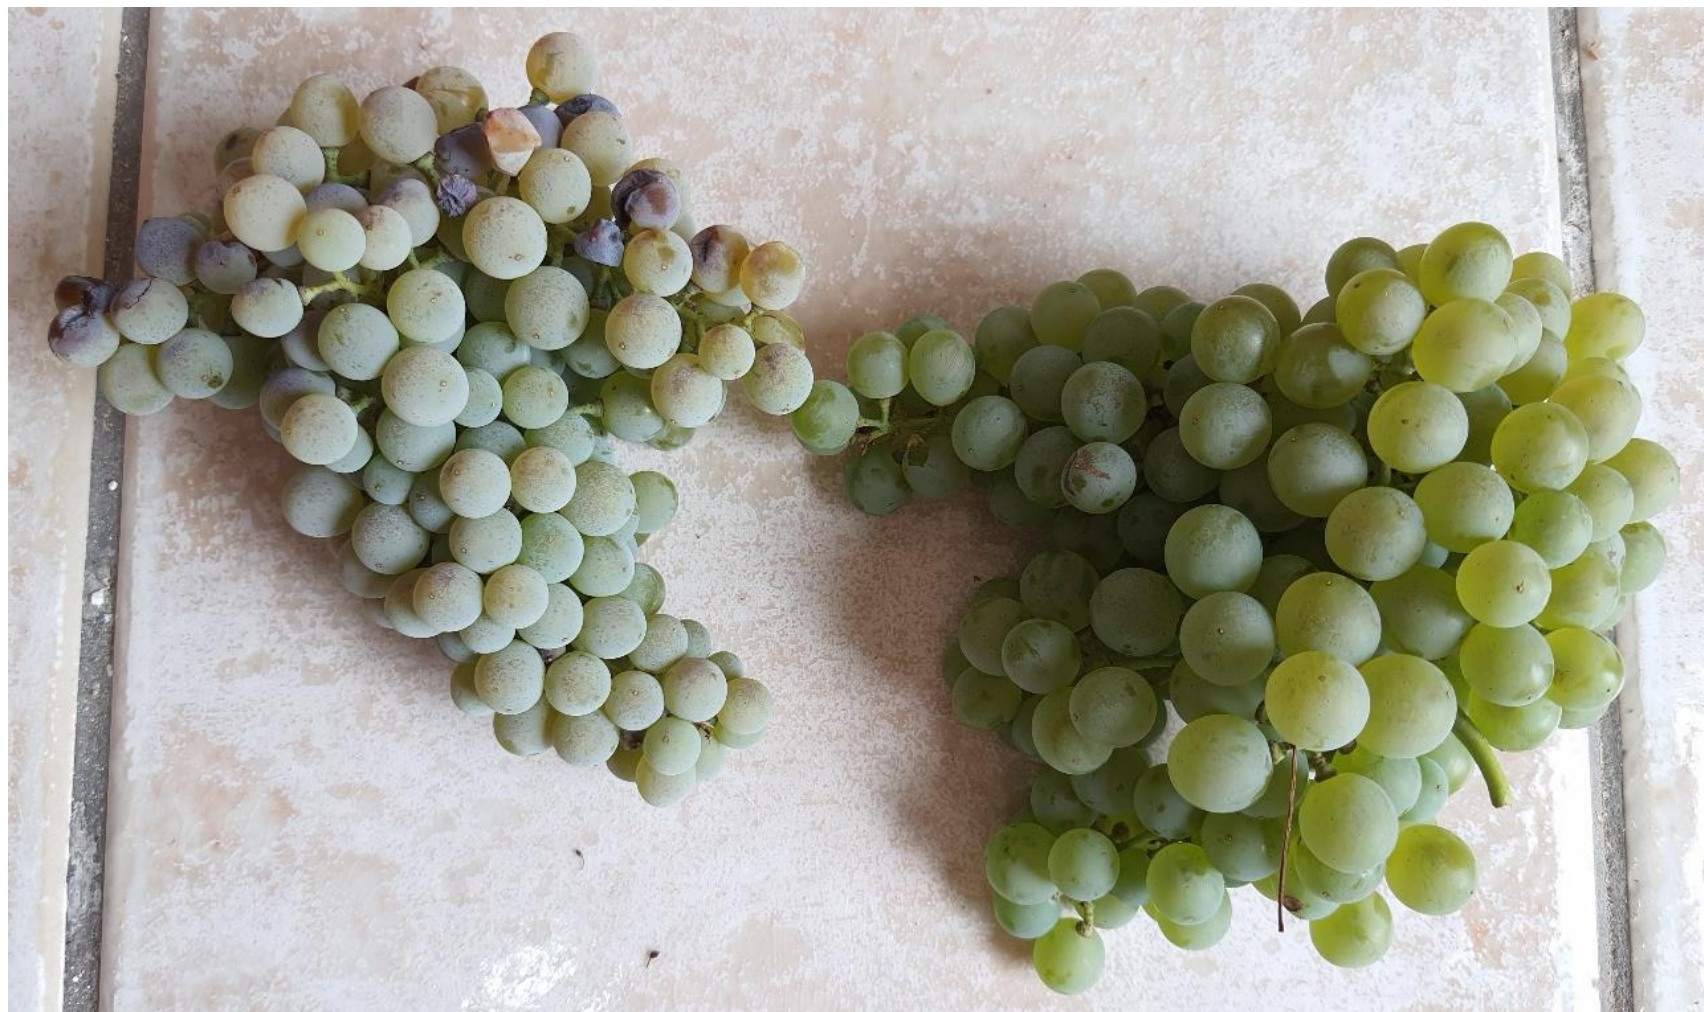

**Figure S3.** Impact of the canopy management on the berry quality. On the left, an example of a bunch obtained in the leaf removed row; on the right, an example of a bunch collected in the not defoliated condition.
